# Supplementary material
Source: Elsevier journal article supplement (https://www.sciencedirect.com/science/article/pii/S1578219019302185)
Supplement: mmc1 [file S1578219019302185:mmc1.doc]

Anexo.

Coordinadores de las secciones: Agustín Buendía, Pablo Fernández-Crehuet, Husein Husein-ElAhmed, Jesús Vega, Agustín Viera, José Manuel Carrascosa, Marta Ferrán, Enrique Gómez, Lucía Ascanio, Ignacio García Doval, Salvador Arias-Santiago y Yolanda Gilaberte.

Participantes: Juan A. Sánchez, Amalia Serrano, Rosa Castillo, Ramón Fernandez, José Armario, Carolina Lluc Cantalejo, Cristina Albarrán, María Cruz Martín, Juan Antonio Martín, Román Barabash, Lara Pérez, Manuel Salamanca, Carlos Hernández, José Francisco Millán, Inmaculada Ruiz, Susana Armesto, Marta González, Valia Beteta, Concepción Cuadrado de Valles, Pilar Cristóbal, María Magdalena Roth, Juan Garcias, Ricardo Fernández de Misa, Estela García, María del Pino Rivero, José Suárez, Birgit Farthmann, Alba Álvarez, Irene García, Caridad Elena Morales, María Cristina Zemba, Trinidad Repiso, Carmen Sastre, María Ubals, Alejandro Fernández, Urbà González, Ramón Grimalt, Sara Gómez, Ingrid López, Franco Antonio Gemigniani, María José Izquierdo, Fernando Alfageme, Nuria Barrientos, Laura María Pericet, Santiago Vidal, Celia Camarero, Pablo Lázaro, Cristina García, María Pilar de Pablo, Pedro Herranz, Natalia del Olmo, María Castellanos, Natalia Jiménez, Sonsoles Aboín, Isabel Aldanondo, Adriana Juanes, Dulce María Arranz, Olga González, Luis Casas, Juan José Vázquez, Carmen Peña, José Luis Cubero, Carlos Feal, María Eugenia Mayo, Nicolás Iglesias, Rafael Rojo, Elfidia Aniz, Sabrina Kindem, Nerea Barrado, Marisa Tirado, Ester Quecedo, Isabel Hernández, Antonio Sahuquillo, Rebeca Bella, Ramón García, Anaid Calle, Francesc Messeguer, Alberto Alfaro, Luisa Casanova, Libe Aspe, María Pilar Moreno, Izaskun Trébol, Gonzalo Serrano, Víctor Manuel Alcalde, Patricia García y Carmen Coscojuela.
